# Supplementary material for: Hybrid Models Identified a 12-Gene Signature for Lung Cancer Prognosis and Chemoresponse Prediction
Source: PLoS One. 2010 Aug 17;5(8):e12222. doi: 10.1371/journal.pone.0012222 (PMC2923187; doi:10.1371/journal.pone.0012222)
Supplement: Table S5 — Comparison of biological functions between 12-gene signature and 15-gene signature with curated database. The biological functions were obtained using Ingenuity Pathway Analysis (IPA). (0.09 MB DOC) [file pone.0012222.s005.doc]

| **Category** | **Category** | **12-gene** | **15-gene** | **Common** |
| --- | --- | --- | --- | --- |
| **Diseases and Disorders** | Cancer |  |  |  |
| Cardiovascular Disease |  |  |  |
| Connective Tissue Disorders |  |  |  |
| Dermatological Diseases and Conditions |  |  |  |
| Genetic Disorder |  |  |  |
| Hematological Disease |  |  |  |
| Hepatic System Disease |  |  |  |
| Immunological Disease |  |  |  |
| Infection Mechanism |  |  |  |
| Inflammatory Disease |  |  |  |
| Inflammatory Response |  |  |  |
| Metabolic Disease |  |  |  |
| Neurological Disease |  |  |  |
| Reproductive System Disease |  |  |  |
| Respiratory Disease |  |  |  |
| Skeletal and Muscular Disorders |  |  |  |
| **Molecular and Cellular Functions** | Amino Acid Metabolism |  |  |  |
| Antigen Presentation |  |  |  |
| Carbohydrate Metabolism |  |  |  |
| Cell Cycle |  |  |  |
| Cell Death |  |  |  |
| Cell Morphology |  |  |  |
| Cell Signaling |  |  |  |
| Cell-To-Cell Signaling and Interaction |  |  |  |
| Cellular Assembly and Organization |  |  |  |
| Cellular Compromise |  |  |  |
| Cellular Development |  |  |  |
| Cellular Function and Maintenance |  |  |  |
| Cellular Growth and Proliferation |  |  |  |
| Cellular Movement |  |  |  |
| DNA Replication, Recombination, and Repair |  |  |  |
| Drug Metabolism |  |  |  |
| Gene Expression |  |  |  |
| Lipid Metabolism |  |  |  |
| Molecular Transport |  |  |  |
| Nucleic Acid Metabolism |  |  |  |
| Post-Translational Modification |  |  |  |
| Protein Synthesis |  |  |  |
| Protein Trafficking |  |  |  |
| RNA Trafficking |  |  |  |
| Small Molecule Biochemistry |  |  |  |
| **Physiological System Development and Function** | Cardiovascular System Development and Function |  |  |  |
| Cell-mediated Immune Response |  |  |  |
| Hematological System Development and Function |  |  |  |
| Immune Cell Trafficking |  |  |  |
| Nervous System Development and Function |  |  |  |
| Organ Development |  |  |  |
| Skeletal and Muscular System Development and Function |  |  |  |
| Tissue Development |  |  |  |
| Tumor Morphology |  |  |  |
| Visual System Development and Function |  |  |  |
